# Supplementary material for: Automated causal inference in application to randomized controlled clinical trials
Source: Springer Nature journal article supplement (doi:10.1038/s42256-022-00470-y), 2022-04-25
Supplement: 42256_2022_470_MOESM1_ESM.pdf [file 42256_2022_470_MOESM1_ESM.pdf]

---

**Supplementary information**

---

**Automated causal inference in application  
to randomized controlled clinical trials**

---

In the format provided by the  
authors and unedited

# Supplementary material

**Ji Q. Wu<sup>1,\*</sup>, Nanda Horeweg<sup>2</sup>, Marco de Bruyn<sup>3</sup>, Remi A. Nout<sup>2,\*\*</sup>,  
Ina M. Jürgenliemk-Schulz<sup>4</sup>, Ludy C.H.W. Lutgens<sup>5</sup>, Jan J. Jobsen<sup>6,\*\*\*</sup>,  
Elzbieta M. van der Steen-Banasik<sup>7</sup>, Hans W. Nijman<sup>3</sup>, Vincent T.H.B.M. Smit<sup>8</sup>,  
Tjalling Bosse<sup>8</sup>, Carien L. Creutzberg<sup>2</sup>, and Viktor H. Koelzer<sup>1,\*</sup>**

<sup>1</sup>Department of Pathology and Molecular Pathology, University Hospital, University of Zurich, Zurich, Switzerland.

<sup>2</sup>Department of Radiation Oncology, Leiden University Medical Center, Leiden, The Netherlands.

<sup>3</sup>Department of Obstetrics and Gynecology, University of Groningen, University Medical Center Groningen, Groningen, The Netherlands.

<sup>4</sup>Department of Radiation Oncology, University Medical Center Utrecht, Utrecht, The Netherlands.

<sup>5</sup>Maastricht Radiation Oncology Clinic, Maastricht, The Netherlands.

<sup>6</sup>Department of Radiotherapy, Medisch Spectrum Twente, Enschede, The Netherlands.

<sup>7</sup>Radiotherapiegroep, Arnhem, The Netherlands.

<sup>8</sup>Department of Pathology, Leiden University Medical Center, Leiden, The Netherlands.

\*Corresponding authors, Jiqing.Wu@usz.ch, Viktor.Koelzer@usz.ch

\*\*Currently employed at department of Radiotherapy, Erasmus MC Cancer Institute, University Medical Center Rotterdam, Rotterdam, The Netherlands.

\*\*\*Currently employed at department of Clinical Epidemiology, Medisch Spectrum Twente, Enschede, The Netherlands.

## ABSTRACT

Randomized controlled trials (RCTs) are considered as the gold standard for testing causal hypotheses in the clinical domain. However, the investigation of prognostic variables of patient outcome in a hypothesized cause-effect route is not feasible using standard statistical methods. Here, we propose a new automated causal inference method (AutoCI) built upon the invariant causal prediction (ICP) framework for the causal re-interpretation of clinical trial data. Compared to existing methods, we show that the proposed AutoCI allows to efficiently determine the causal variables with a clear differentiation on two real-world RCTs of endometrial cancer patients with mature outcome and extensive clinicopathological and molecular data. This is achieved via suppressing the causal probability of non-causal variables by a wide margin. In ablation studies, we further demonstrate that the assignment of causal probabilities by AutoCI remain consistent in the presence of confounders. In conclusion, these results confirm the robustness and feasibility of AutoCI for future applications in real-world clinical analysis.

| Abbreviation | Definition                                                |
|--------------|-----------------------------------------------------------|
| RCT          | Randomised controlled trials                              |
| PORTEC       | Post operative radiation therapy in endometrial carcinoma |
| EC           | Endometrial carcinoma (cancer)                            |
| ESGO         | European Society of Gynaecological Oncology               |
| ESTRO        | European Society for Radiotherapy and Oncology            |
| ESMO         | European Society of Medical Oncology                      |
| Grade        | Tumor grading                                             |
| LVSI         | Lymphovascular space invasion                             |
| POLEmut      | Polymerase epsilon mutant EC                              |
| MMRd         | Mismatch repair deficient EC                              |
| p53abn       | p53 abnormal EC                                           |
| NSMP         | EC with no specific molecular profile                     |
| L1CAM        | L1 cell adhesion molecule                                 |
| P            | Pathological variables                                    |
| PM           | Pathological and molecular variables                      |
| PMI          | Pathological, molecular and immune variables              |
| HR           | Hazard ratio                                              |
| CI           | Confidence interval                                       |
| i.d.         | identically distributed                                   |
| NP           | Non-deterministic polynomial-time                         |
| SCM          | Structural causal model                                   |
| ICP          | Invariant causal prediction                               |
| PRED         | Predicate module                                          |
| FID          | Fréchet inception distance                                |
| JS           | Jaccard similarity                                        |
| FWER         | Family-wise error rate                                    |
| ABCD         | Active budgeted causal design strategy                    |

**Table 1.** The abbreviation table of clinical, statistical and causal definitions.

## References

1. Gaunt, A. L., Brockschmidt, M., Kushman, N. & Tarlow, D. Differentiable programs with neural libraries. *Int. Conf. on Mach. Learn.* 1213–1222 (2017).
2. Mao, J., Gan, C., Kohli, P., Tenenbaum, J. B. & Wu, J. The neuro-symbolic concept learner: Interpreting scenes, words, and sentences from natural supervision. *Int. Conf. on Learn. Represent.* (2018).
3. Vedantam, R. *et al.* Probabilistic neural symbolic models for interpretable visual question answering. *Int. Conf. on Mach. Learn.* 6428–6437 (2019).
4. Ellis, K. *et al.* Dreamcoder: Growing generalizable, interpretable knowledge with wake-sleep bayesian program learning. *arXiv preprint arXiv:2006.08381* (2020).
5. Valkov, L., Chaudhari, D., Srivastava, A., Sutton, C. & Chaudhuri, S. Houdini: Lifelong learning as program synthesis. *Adv. Neural Inf. Process. Syst.* 8687–8698 (2018).

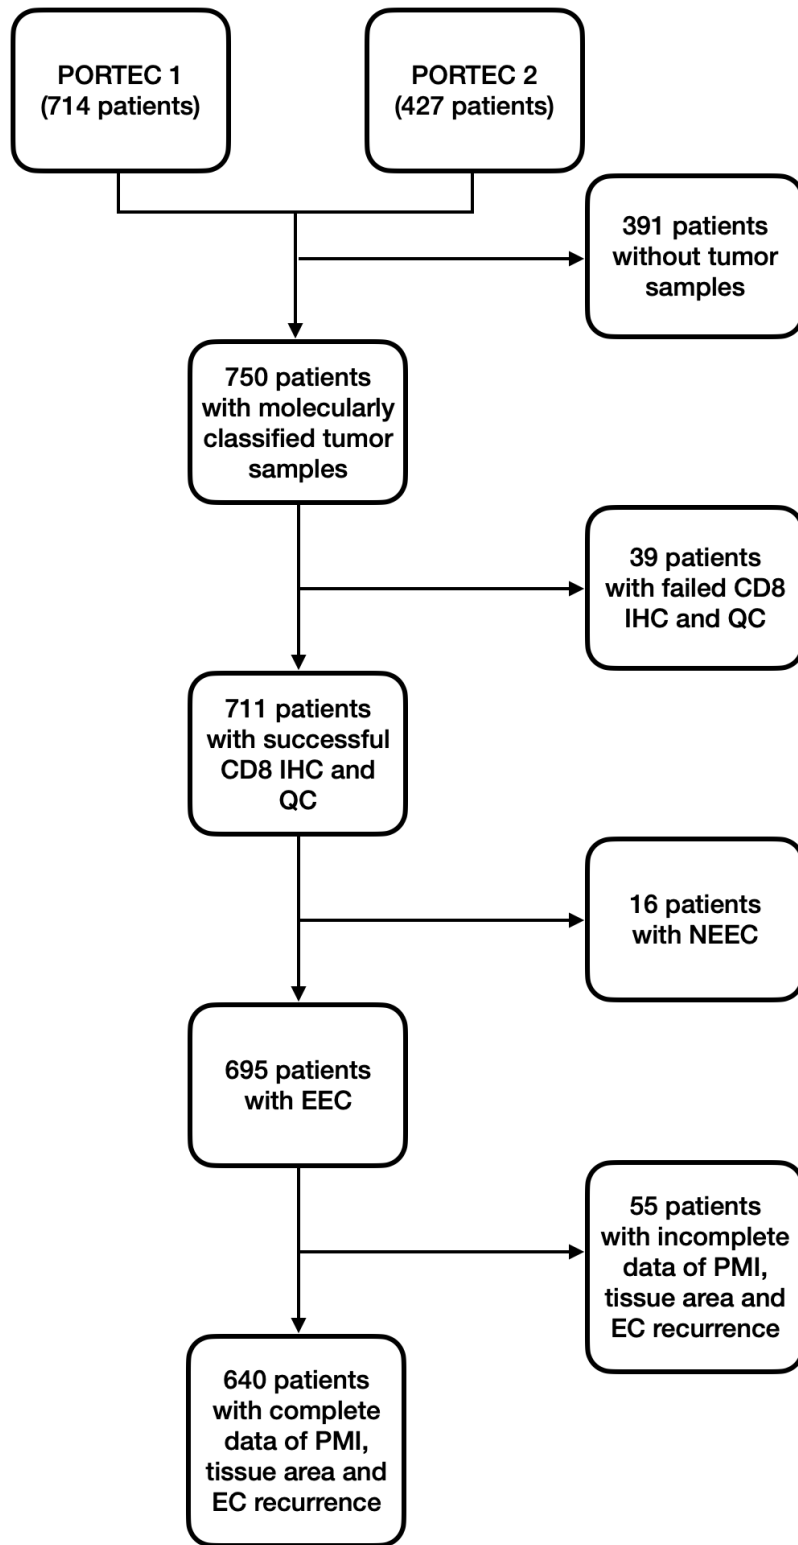

**Figure 1.** The consort diagram presenting the process of patient selection. Abbreviations: QC - quality control, IHC - immunohistochemistry, EEC- endometrioid endometrial carcinoma, NEEC- non-endometrioid endometrial carcinoma.

|                                    | <b>Excluded</b>              | <b>Included</b>               |                |
|------------------------------------|------------------------------|-------------------------------|----------------|
| <b>Characteristics</b>             | <b>N = 501</b>               | <b>N = 640</b>                | <b>p-value</b> |
| <b>Age (Median, IQR)</b>           | 67.0 (13.0)                  | 68.0 (11.0)                   | < 0.001        |
| <b>Stage*</b>                      |                              |                               |                |
| IA                                 | 199 (39.7%)                  | 166 (25.9%)                   | < 0.0001       |
| ≥ IB                               | 302 (60.3%)                  | 474 (74.1%)                   |                |
| <b>Myometrial invasion</b>         |                              |                               |                |
| ≤ 50%                              | 200 (39.9%)                  | 165 (25.8%)                   | < 0.0001       |
| > 50%                              | 301 (60.1%)                  | 475 (74.2%)                   |                |
| <b>Grade</b>                       |                              |                               |                |
| 1/2                                | 426 (85.0%)                  | 563 (88.0%)                   | 0.15           |
| 3                                  | 75 (15.0%)                   | 77 (12.0%)                    |                |
| <b>LVSI</b>                        |                              |                               |                |
| None/Mild                          | 300 (94.9%)                  | 610 (95.3%)                   | 0.80           |
| Severe                             | 16 (5.1%)                    | 30 (4.7%)                     |                |
| <b>Received adjuvant treatment</b> |                              |                               |                |
| None                               | 212 (42.3%)                  | 160 (25.0%)                   | <0.0001        |
| Vaginal brachytherapy              | 240 (47.9%)                  | 314 (49.1%)                   |                |
| Pelvic EBRT                        | 49 (9.8%)                    | 166 (25.9%)                   |                |
| <b>Recurrence free survival**</b>  |                              |                               |                |
| Mean RFS (years, SE, 95% CI)       | 14.81<br>(0.25, 14.32-15.31) | 15.24<br>(0.228, 14.70-15.68) | 0.140          |
| 5-year RFS (% , SE)                | 85.7 (0.016)                 | 89.8 (0.012)                  |                |
| <b>Overall survival**</b>          |                              |                               |                |
| Mean OS (years, SE, 95% CI)        | 12.54<br>(0.33, 11.89-13.20) | 12.60<br>(0.25, 12.12-13.09)  | 0.450          |
| 5-year OS (% , SE)                 | 81.2 (0.017)                 | 85.7 (0.014)                  |                |

**Table 2.** The characteristics comparison of excluded and included patients. \* After a posteriori central review 2 cases were classified as stage II, 2 as stage IIIA and 1 as stage IIIB. \*\* The p-values of RFS and OS are computed from log-rank test.

|                                            | <b>PORTEC 1</b> | <b>PORTEC 2</b> | <b>Total</b>   |
|--------------------------------------------|-----------------|-----------------|----------------|
|                                            | <b>N = 305</b>  | <b>N = 335</b>  | <b>N = 640</b> |
| <b>Patient Demographics</b>                |                 |                 |                |
| Age (Median, IQR)                          | 67.0 (13.0)     | 69.0 (10.0)     | 68.0 (11.0)    |
| <b>Stage*</b>                              |                 |                 |                |
| IA                                         | 115 (37.7%)     | 51 (15.2%)      | 166 (25.9%)    |
| ≥ IB                                       | 190 (62.3%)     | 284 (84.8%)     | 474 (74.1%)    |
| <b>Pathological</b>                        |                 |                 |                |
| <b>Myometrial invasion</b>                 |                 |                 |                |
| ≤ 50%                                      | 115 (37.7%)     | 50 (14.9%)      | 165 (25.8%)    |
| > 50%                                      | 190 (62.3%)     | 285 (85.1%)     | 475 (74.2%)    |
| <b>Grade</b>                               |                 |                 |                |
| 1/2                                        | 256 (83.9%)     | 307 (91.6%)     | 563 (88.0%)    |
| 3                                          | 49 (16.1%)      | 28 (8.4%)       | 77 (12.0%)     |
| <b>LVSI</b>                                |                 |                 |                |
| None/Mild                                  | 291 (95.4%)     | 319 (95.2%)     | 610 (95.3%)    |
| Severe                                     | 14 (4.6%)       | 16 (4.8%)       | 30 (4.7%)      |
| <b>Molecular</b>                           |                 |                 |                |
| <b>L1CAM</b>                               |                 |                 |                |
| None/≤10% positive cells                   | 291 (95.4%)     | 313 (93.4%)     | 604 (94.4%)    |
| >10% positive cells                        | 14 (4.6%)       | 22 (6.7%)       | 36 (5.6%)      |
| <b>Molecular Class</b>                     |                 |                 |                |
| POLEmut                                    | 18 (5.9%)       | 16 (4.8%)       | 34 (5.3%)      |
| MMRd                                       | 93 (30.5%)      | 93 (27.8%)      | 186 (29.1%)    |
| p53abn                                     | 24 (7.9%)       | 22 (6.6%)       | 46 (7.2%)      |
| NSMP                                       | 170 (55.7%)     | 204 (60.8%)     | 374 (58.4%)    |
| <b>Immune</b>                              |                 |                 |                |
| <b>(Intraepithelial) CD8+ cell density</b> |                 |                 |                |
| ≤ 5.0                                      | 178 (58.4%)     | 112 (33.4%)     | 290 (45.3%)    |
| > 5.0                                      | 127 (41.6%)     | 223 (66.6%)     | 350 (54.7%)    |

**Table 3.** The characteristics of study participants for PORTEC 1 and 2. \* After a posteriori central review 2 cases were classified as stage II, 2 as stage IIIA and 1 as stage IIIB.

| Epoch | COMP(nn,CAT(FILTER(pred))) | CAT(COMP(CONV(nn), FILTER(pred))) | COMP(nn, CAT(REPEAT(2, FILTER(pred)))) | COMP(nn, CAT(REPEAT(3, FILTER(pred)))) |
|-------|----------------------------|-----------------------------------|----------------------------------------|----------------------------------------|
| 2     | <b>0.00±0.00</b>           | 0.00±0.00                         | 0.00±0.00                              | 0.00±0.02                              |
| 4     | <b>0.00±0.00</b>           | 0.03±0.05                         | 0.00±0.00                              | 0.01±0.03                              |
| 6     | <b>0.11±0.01</b>           | 0.11±0.04                         | 0.11±0.00                              | 0.10±0.00                              |
| 8     | <b>0.23±0.02</b>           | 0.21±0.03                         | 0.22±0.02                              | 0.20±0.01                              |
| 10    | <b>0.34±0.02</b>           | 0.32±0.04                         | 0.32±0.02                              | 0.31±0.01                              |
| 12    | <b>0.46±0.03</b>           | 0.44±0.04                         | 0.43±0.03                              | 0.41±0.02                              |
| 14    | <b>0.57±0.04</b>           | 0.55±0.04                         | 0.54±0.04                              | 0.51±0.02                              |
| 16    | <b>0.69±0.05</b>           | 0.66±0.05                         | 0.65±0.05                              | 0.61±0.03                              |
| 18    | <b>0.80±0.06</b>           | 0.77±0.05                         | 0.75±0.06                              | 0.71±0.03                              |
| 20    | <b>0.92±0.06</b>           | 0.88±0.05                         | 0.86±0.06                              | 0.82±0.03                              |

**Table 4.** The JS score and its standard deviation of compared type-safe candidates for PORTEC study (PMI).

|                         | Task  | Typed | Functional | Code availability |
|-------------------------|-------|-------|------------|-------------------|
| NTPT <sup>1</sup>       | Misc. | ✗     | ✗          | ✗                 |
| NS-CL <sup>2</sup>      | VQA   | ✗     | ✓          | ✓                 |
| Prob-NMN <sup>3</sup>   | VQA   | ✗     | ✓          | ✓                 |
| DreamCoder <sup>4</sup> | Misc. | ✓     | ✓          | ✗                 |
| HOUDINI <sup>5</sup>    | Misc. | ✓     | ✓          | ✓                 |

**Table 5.** The comparison between existing program synthesis languages.

|                             | Jaccard Similarity (FWER) |                     |                      |
|-----------------------------|---------------------------|---------------------|----------------------|
|                             | 2 Confounders             | 1 Confounder        | 0 Confounder         |
| F-test + t-test             | 0.292 (1.00)              | 0.460 (0.80)        | 0.515 (0.67)         |
| Levene-test + Wilcoxon-test | 0.213 (1.00)              | 0.479 (0.85)        | 0.572 (0.71)         |
| <b>mFID</b>                 | <b>0.911 (0.13)</b>       | <b>0.923 (0.14)</b> | <b>0.994 (0.006)</b> |

Finite sample setting

|                             | Jaccard Similarity (FWER) |                     |                     |
|-----------------------------|---------------------------|---------------------|---------------------|
|                             | 2 Confounders             | 1 Confounder        | 0 Confounder        |
| F-test + t-test             | 0.232 (1.00)              | 0.359 (0.90)        | 0.472 (0.78)        |
| Levene-test + Wilcoxon-test | 0.256 (1.00)              | 0.344 (0.91)        | 0.502 (0.74)        |
| <b>mFID</b>                 | <b>0.922 (0.08)</b>       | <b>0.928 (0.12)</b> | <b>0.985 (0.02)</b> |

ABCD setting

**Table 6.** The comparison of statistical measurements for toy experiments. Top: The results of the compared statistical measurements for the Finite sample setting. Bottom: The results of the compared statistical measurements for the ABCD setting. Here, all the measurements are applied for training the same type-safe function COMP(nn,CAT(FILTER(pred))) under the proposed causal differentiable learning scheme. F-test + t-test is used in ICP and AICP. Levene-test + Wilcoxon-test is used in NICP.

| Epoch | <b>COMP(nn,CAT(FILTER(pred)))</b> | COMP(nn, CAT(REPEAT(3, FILTER(pred)))) | COMP(nn, CAT(REPEAT(2, FILTER(pred)))) | CAT(COMP(CONV(nn), FILTER(pred))) |
|-------|-----------------------------------|----------------------------------------|----------------------------------------|-----------------------------------|
| 2     | <b>0.00±0.00</b>                  | 0.00±0.00                              | 0.00±0.00                              | 0.00±0.00                         |
| 4     | <b>0.00±0.00</b>                  | 0.00±0.00                              | 0.00±0.00                              | 0.00±0.00                         |
| 6     | <b>0.00±0.00</b>                  | 0.00±0.00                              | 0.00±0.00                              | 0.00±0.00                         |
| 8     | <b>0.00±0.00</b>                  | 0.00±0.00                              | 0.00±0.00                              | 0.00±0.02                         |
| 10    | <b>0.00±0.01</b>                  | 0.00±0.01                              | 0.00±0.01                              | 0.01±0.06                         |
| 12    | <b>0.00±0.02</b>                  | 0.00±0.03                              | 0.00±0.03                              | 0.01±0.08                         |
| 14    | <b>0.01±0.05</b>                  | 0.01±0.06                              | 0.01±0.05                              | 0.03±0.12                         |
| 16    | <b>0.04±0.11</b>                  | 0.04±0.11                              | 0.04±0.11                              | 0.06±0.16                         |
| 18    | <b>0.12±0.20</b>                  | 0.12±0.20                              | 0.12±0.20                              | 0.17±0.25                         |
| 20    | <b>0.35±0.31</b>                  | 0.35±0.31                              | 0.34±0.31                              | 0.40±0.34                         |
| 22    | <b>0.99±0.05</b>                  | 0.99±0.06                              | 0.99±0.04                              | 0.91±0.24                         |

**Table 7.** The JS score and its standard deviation of compared type-safe candidates for toy experiments (Finite sample setting).

| Epoch | <b>COMP(nn,CAT(FILTER(pred)))</b> | COMP(nn, CAT(REPEAT(2, FILTER(pred)))) | COMP(nn, CAT(REPEAT(3, FILTER(pred)))) | CAT(COMP(CONV(nn), FILTER(pred))) |
|-------|-----------------------------------|----------------------------------------|----------------------------------------|-----------------------------------|
| 2     | <b>0.00±0.00</b>                  | 0.00±0.00                              | 0.00±0.00                              | 0.00±0.00                         |
| 4     | <b>0.00±0.00</b>                  | 0.00±0.01                              | 0.00±0.01                              | 0.00±0.01                         |
| 6     | <b>0.00±0.00</b>                  | 0.00±0.01                              | 0.00±0.01                              | 0.00±0.01                         |
| 8     | <b>0.00±0.01</b>                  | 0.00±0.01                              | 0.00±0.02                              | 0.00±0.01                         |
| 10    | <b>0.00±0.01</b>                  | 0.00±0.02                              | 0.00±0.02                              | 0.01±0.04                         |
| 12    | <b>0.00±0.02</b>                  | 0.00±0.03                              | 0.00±0.03                              | 0.02±0.11                         |
| 14    | <b>0.01±0.04</b>                  | 0.01±0.05                              | 0.01±0.05                              | 0.05±0.16                         |
| 16    | <b>0.04±0.10</b>                  | 0.04±0.11                              | 0.04±0.11                              | 0.11±0.23                         |
| 18    | <b>0.13±0.20</b>                  | 0.13±0.21                              | 0.13±0.20                              | 0.23±0.31                         |
| 20    | <b>0.34±0.32</b>                  | 0.34±0.32                              | 0.33±0.31                              | 0.43±0.35                         |
| 22    | <b>0.99±0.09</b>                  | 0.97±0.13                              | 0.95±0.16                              | 0.78±0.33                         |

**Table 8.** The JS score and its standard deviation of compared type-safe candidates for toy experiments (ABCD setting).
